# Supplementary material for: Knockout of the S-acyltransferase Gene, PbPAT14, Confers the Dwarf Yellowing Phenotype in First Generation Pear by ABA Accumulation
Source: PubMed Central journal article supplement (PMC6941133; doi:10.3390/ijms20246347), 2019-12-16
Supplement: ijms-20-06347-s001.pdf [file ijms-20-06347-s001.pdf]

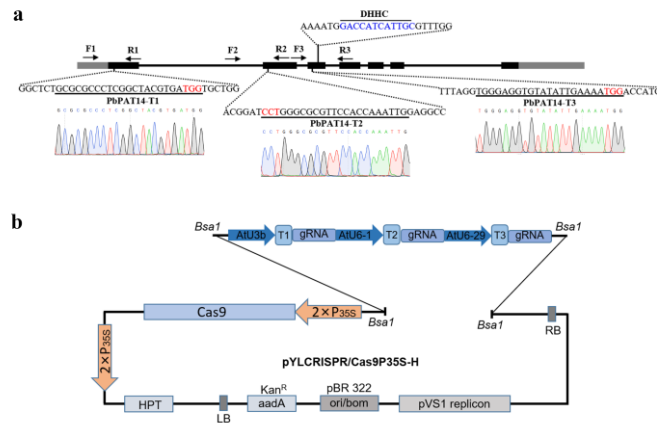

**Figure S3.** Target sites in the *PbPAT14* gene and schematic diagram illustrating how the Cas9/sgRNA construct was assembled. (a) Illustration of the three target sites (PbPAT14-T1, PbPAT14-T2, and PbPAT14-T3). Black stripe, exon. Black line, intron. Grey stripe, UTR (untranslated regions). Red and blue nucleotides represent PAM (protospacer adjacent motif) and DHHC sequences, respectively. F1/F2, R1/R2, and F3/R3 indicate primer binding sites used for PCR amplification. (b) Schematic diagram illustrating the construction of the three expression cassettes in the binary vector. Three *Arabidopsis* promoters (AtU3b, AtU6-1, and AtU6-29) were used to drive expression of the three target sequences (T1, T2, and T3). The three sgRNA expression cassettes were inserted into the binary vector with *Bsa1*.

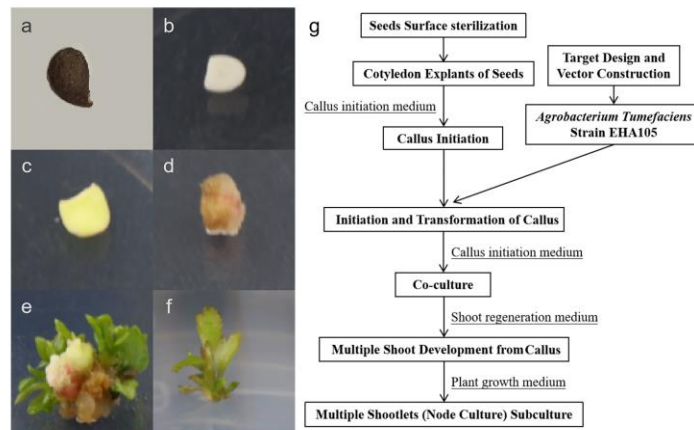

**Figure S4.** Callus induction and pear transformation. (a) Pear seeds (*Pyrus betulifolia*) were disinfected with HgCl<sub>2</sub>. (b) Cotyledon from a pear seed. (c) Callus induction from cotyledons. (d) The well-developed calli infiltrated by the *Agrobacterium tumefaciens* strain, EHA105. (e) Proliferation of multiple shoots from the calli. (f) Plantlet formation. (g) A flow chart outlining the process of pear regeneration from cotyledons.

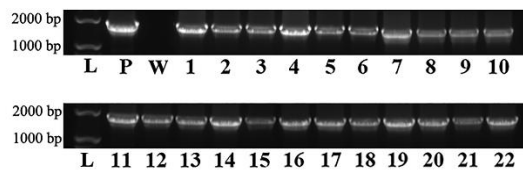

**Figure S5.** Identification of the 22 transgenic lines. 'P', positive control, 'W', wild-type (negative control), 'L', DNA ladder.

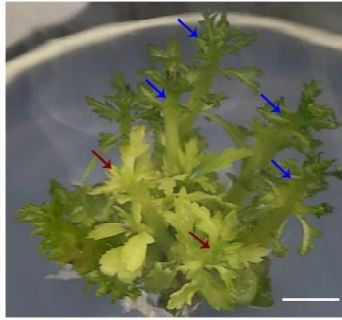

**Figure S6.** Phenotype of the regenerated pear shoots generated on CRISPR/Cas9-*PbPAT14* transformed calli. Red arrows indicate pear transformants with dwarf yellowing phenotype, and blue arrows indicate green shoots without this phenotype. Of the 22 transgenic lines generated, six (27%) exhibited the dwarf yellowing phenotype. Bars, 1cm.

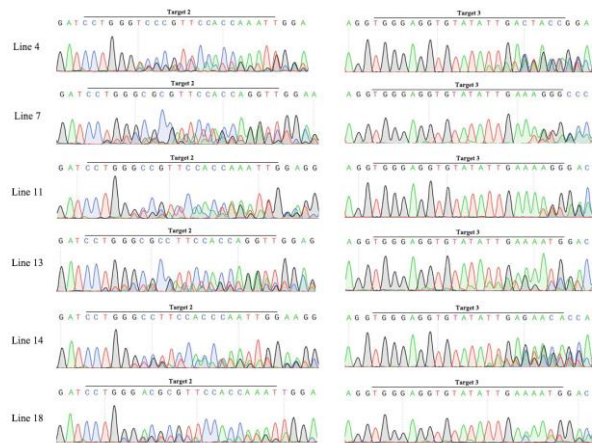

**Figure S7.** Sequence peaks of the target sites in pear.

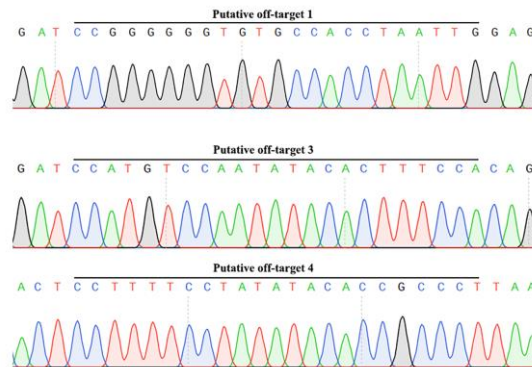

**Figure S8.** Sequence peaks of the potential off-target sites in pear.

**Table S1.** Information regarding *AtPAT14* and putative *PbPAT14*s.

| Name             | Accession Number | E-value   | Sequence                                                                     |
|------------------|------------------|-----------|------------------------------------------------------------------------------|
| <i>AtPAT14</i>   | AT3G60800.1      |           | MHRSGTMAWNVFKFCTALRGLGSMILLVLGVVGVVYAVVLTNYGPALSQGGDLSLAALTILIFHFLMLWSY      |
| <i>PbPAT14-1</i> | Pbr029181.1      | 6.00E-112 | MHRSGVAMAWNFKFCTALRGLGSMILLVLGVVGVVYVTVLTYNYPALYDGGDLSLVAVAVLILFHCLLVMLLW    |
| <i>PbPAT14-2</i> | Pbr041901.1      | 2.00E-89  | MAWNAFKLCTALRALGYVMVVLVVAIVGLTYAVVVLVNYLPSILSGVNFVIAFPLLLIFHFLMLWSYFNVVLT    |
| <i>PbPAT14-3</i> | Pbr029311.1      | 3.00E-19  | MSSPGLMNAVVTGVAVMCVFNYSASFVFRDPGRVPSTYMPDVEDSGNPMHEIKRKGDLRYCQKCSHYKPARAHH   |
| <i>PbPAT14-4</i> | Pbr029300.1      | 3.00E-19  | MKGNTLNQKRPAFSLILQTRSPHQPPNPRILPAENDTQSPGDAVVLTPVPPGPPPPNIPDTPMTRSLGFLPVTVVV |

|            |             |          |                                                                                   |
|------------|-------------|----------|-----------------------------------------------------------------------------------|
| PbPAT14-5  | Pbr010700.2 | 5.00E-17 | MKFERFLSIPILMVFLGIVGVYITVFIFIDDVWGLKSSAGSLNALVFIFLASLCLFSFFGCVLTDPGHVPASYVPDVEDSA |
| PbPAT14-6  | Pbr025932.1 | 2.00E-14 | MSRKNQVWDAPSDDTAAAAPPPPERERLYLVWQGNKFLCGGRIVFGHDAASFLTSFLIGCPALAFCTRMLVMM         |
| PbPAT14-7  | Pbr021305.1 | 2.00E-14 | MSRKNQVWDAPSDDTAAAAPPPPERERLYLVWQGNKFLCGGRIVFGHDAASFLTSFLIGCPALAFCTRMLVMMR        |
| PbPAT14-8  | Pbr018617.1 | 3.00E-14 | MRNNDMVRTQQERMYGNALPHQHSDSDRRIDAPGPSRLRYQVWKGNNKFFNGRIILGPDERSLILTVSLIVVPVILF     |
| PbPAT14-9  | Pbr019497.1 | 5.00E-14 | MTHLHNGQTPAKFILGGRLIFGPDARSLLVTLIIAPVHFCVFAWHLRHEFPSYNAGYAILVVAIVFTIYVLLFLTS      |
| PbPAT14-10 | Pbr027121.1 | 8.00E-14 | MNAEPNHHLRHSPAGGAAAGGPELVRTYKTWKGSNIFLGGRLIFGPDVRSPLTVSLLTVPAVFCIFVGRKLIDHLG      |

**Table S2.** Sequence of primers used for gene cloning and qRT-PCR.

| Primer      | Sequence (5'-3')                        |
|-------------|-----------------------------------------|
| attB1       | GGGACAAGTTTGTACAAAAAAGCAGGCT            |
| attB2       | GGGACCACTTTGTACAAGAAAGCTGGGT            |
| 14-1F       | AAAAAGCAGGCTCCATGCATAGATCTGGAGTAGCCATG  |
| 14-1R       | AGAAAGCTGGGTCTTAGAACTCTTGGGAATCAAACCTCC |
| 14-2F       | AAAAAGCAGGCTCCATGGCGTGAACGCGTTCAAG      |
| 14-2R       | AGAAAGCTGGGTCTTATAAAGGCTGAAGTGCATTC     |
| GAPcF       | CACTTGAAGGGTGGTGCCAAG                   |
| GAPcR       | CCTGTTGTCGCCAACGAAGTC                   |
| LBb1(BP)    | GCGTGGACCGCTTGCTGCAACT                  |
| LP          | TTCGACTATTCACCGTTCGAC                   |
| RP          | TCCAATTAGGAGGCACAACAC                   |
| Action-F    | TTGGTATGGGTCAGAAGG                      |
| Action-R    | CTGTGAGCAGAAGCTGGGTG                    |
| qPbNCED3F   | CTACAAGACACCGCCACCTT                    |
| qPbNCED3R   | AGTGGGAGTTGAAGGTTGTTGA                  |
| qPbABI1F    | AACTCAGCAGGTGCAGTGG                     |
| qPbABI1R    | CCCAACGGTTTCTGGGGC                      |
| qPbMYB2F    | ACTTGCCCGGTAGAACAGAC                    |
| qPbMYB2R    | CTGGTACAGCTTCGGGCAA                     |
| qPbMYC2F    | AATCTGTGGACGGACGACAA                    |
| qPbMYC2R    | GGGTAGTCAGAAGTGGAGGC                    |
| qPbRD22F    | GTTGGCAAAGGAGGAGTGTCC                   |
| qPbRD22R    | TTTCCGTGGCTGCATACTTG                    |
| qPbSnRK2.2F | CCCTGCTGATTTGATGGACGA                   |
| qPbSnRK2.2R | TGCTGGTATAGTAGCCTCCTCA                  |
| qPbSnRK2.6F | AACTATGCGGTAGTGGAGCG                    |
| qPbSnRK2.6R | TGCTTTGGATCCACCTTCCC                    |

**Table S3.** Sequence of primers used for CRISPR/Cas9 vector construction and mutant detection.

| Primer | Sequence (5'-3') |
|--------|------------------|
|--------|------------------|

|            |                                       |
|------------|---------------------------------------|
| gRT#T1     | GCGCGCCCTCGGCTACGTGAgttttagagctagaat  |
| AtU3b#T1   | TCACGTAGCCGAGGGCGCGCTgaccaatgttgctcc  |
| gRT#T2     | CAATTTGGTGGAAACGCGCCCgttttagagctagaat |
| AtU6-1#T2  | GGGCGCGTTCACCAAATTGCaactactctgctct    |
| gRT#T3     | TGGGAGGTGTATATTGAAAgttttagagctagaat   |
| AtU6-29#T3 | TTTTCAATATACACCTCCCAaactcttagtgact    |
| VecF       | TACGCTGATCTCTTCCTTGCTGCT              |
| VecR       | TGTCCGACTTACCCCTGTTCTTGT              |
| F1         | TTCCGTCGGATCCCAAATGGGGA               |
| R1         | CAGAAAATGGAACAAGATCAAGA               |
| F2         | GGAATTTTAATTCGAGGTTTTA                |
| R2         | AAACAGAACAATGATGGCAAC                 |
| F3         | AGTGATCCAGCAAATCAAAAAATAC             |
| R3         | GTGACAAGAGTTGTCTCAAGAAATG             |
| OT1F       | CTCGCAGTAAATTTGTAAAATCTGC             |
| OT1R       | CCAACACAATTAACAACCCATACAC             |
| OT2F       | CCAGGGAAGTGATCCTTGAATG                |
| OT2R       | TTAATTTGTGCCAGTCCGAATG                |
| OT3F       | AATGAAGTGTCGGTGGTTAGCT                |
| OT3R       | CCTTAAATTGCAGGTGGTGGAG                |
| OT4F       | CAAATGTCGTCGTACACTGCTT                |
| OT4R       | TAATTCTAGGCGTCTTGGGATG                |

**Table S4.** Potential off-target analysis at the three target sites of *PbPAT14* in pear.

| Target | Off-target sites | Putative off-target sequences*            | Putative off-target loci<br>( <i>Pyrus betulifolia</i> ) | Putative off-target loci<br>( <i>Pyrus bretschneideri</i> ) | Number of<br>mismatched bases | Number of<br>examined lines | Number of lines<br>with mutations |
|--------|------------------|-------------------------------------------|----------------------------------------------------------|-------------------------------------------------------------|-------------------------------|-----------------------------|-----------------------------------|
| 2      | 1                | CCGGGGGGIGT <u>G</u> CCACCAIAATTG         | Chr7: +11900769                                          | Scaffold937.0: +148896                                      | 4                             | 6                           | 0                                 |
|        | 2                | CCCGGGCCCGTTCACCA <u>CC</u> CGTG          | -                                                        | Scaffold803.0: -132074                                      | 4                             | 6                           | 0                                 |
| 3      | 3                | CCAT <u>G</u> TCCAATATACACTT <u>CC</u> CA | Chr16: - 323527                                          | Chr16: - 4114455                                            | 4                             | 6                           | 0                                 |
|        | 4                | CCTTT <u>C</u> CTATATACAC <u>CC</u> CCCT  | Chr3: -30953462                                          | Chr3: -1285207                                              | 4                             | 6                           | 0                                 |

\* Mismatched bases are shown in underline.

**Table S5.** Identification of *Arabidopsis* homologous genes involved in the ABA pathway of pear (*Pyrus bretschneideri* Rehd.).

| Gene in Arabidopsis | Gene model in TAIR | Homologous genes in pear | Accession Number | E-value   | Protein similarity (%) |
|---------------------|--------------------|--------------------------|------------------|-----------|------------------------|
| AtNCED3             | AT3G14440.1        | PbNCED3                  | Pbr025271.1      | 0         | 68.06                  |
| AtABI1              | AT4G26080.1        | PbABI1                   | Pbr026157.1      | 2.00E-141 | 59.83                  |
| AtMYB2              | AT2G47190.1        | PbMYB2                   | Pbr008630.1      | 7.00E-86  | 53.65%                 |
| AtMYC2              | AT1G32640.1        | PbMYC2                   | Pbr042466.1      | 0         | 53.26                  |

|           |             |           |             |   |       |
|-----------|-------------|-----------|-------------|---|-------|
| AtSnRK2.2 | AT3G50500.2 | PbSnRK2.2 | Pbr007881.1 | 0 | 74.87 |
| AtSnRK2.6 | AT4G33950.1 | PbSnRK2.6 | Pbr040276.1 | 0 | 73.96 |

**Table S6.** Statistical information describing the mutant types of *PbPAT14* in the first generation.

| Target   | Plant ID | No. of clones sequenced | No. of clones with mutant alleles | No. of different mutant alleles |
|----------|----------|-------------------------|-----------------------------------|---------------------------------|
| Target 1 | 4        | 8                       | 0                                 | 0                               |
|          | 7        | 5                       | 0                                 | 0                               |
|          | 11       | 8                       | 0                                 | 0                               |
|          | 13       | 9                       | 0                                 | 0                               |
|          | 14       | 7                       | 0                                 | 0                               |
|          | 18       | 7                       | 0                                 | 0                               |
|          | Total    |                         | 44                                | 0                               |
| Target 2 | 4        | 8                       | 6                                 | 3                               |
|          | 7        | 10                      | 10                                | 4                               |
|          | 11       | 9                       | 9                                 | 3                               |
|          | 13       | 9                       | 9                                 | 3                               |
|          | 14       | 8                       | 3                                 | 2                               |
|          | 18       | 7                       | 7                                 | 3                               |
|          | Total    |                         | 51                                | 44                              |
| Target 3 | 4        | 8                       | 8                                 | 3                               |
|          | 7        | 6                       | 6                                 | 2                               |
|          | 11       | 6                       | 5                                 | 2                               |
|          | 13       | 7                       | 1                                 | 1                               |
|          | 14       | 10                      | 10                                | 4                               |
|          | 18       | 10                      | 2                                 | 1                               |
|          | Total    |                         | 47                                | 32                              |
